# Supplementary material for: Theoretical study on the reaction mechanism of hydrogenation of furfural to furfuryl alcohol on Lewis acidic BEA zeolites: effects of defect structure and tetravalent metals substitution
Source: Royal Society of Chemistry journal article supplement (doi:10.1039/c7cp04229a), 2017-01-01
Supplement: c7cp04229a1.pdf [file c7cp04229a1.pdf]

## Electronic Supplementary Information

### Theoretical Study on Reaction Mechanisms of Furfural Hydrogenation to Furfuryl Alcohol on Lewis Acidic BEA Zeolites: Effects of Defect Structure and Tetravalent Metals Substitution

Yuwanda Injongkol,<sup>a,b</sup> Thana Maihom,<sup>\*a,b</sup> Piti Treesukul,<sup>a</sup> Jakkapan Sirijaraensre,<sup>b</sup> Bundet Boekfa,<sup>a,b</sup> and Jumras Limtrakul<sup>c</sup>

<sup>a</sup>Department of Chemistry, Faculty of Liberal Arts and Science, Kasetsart University, Kamphaeng Saen Campus, Nakhon Pathom 73140, Thailand

<sup>b</sup>Center for Advanced Studies in Nanotechnology for Chemical, Food and Agricultural Industries, KU Institute for Advanced Studies, Kasetsart University, Bangkok 10900, Thailand.

<sup>c</sup>Department of Materials Science and Engineering, Vidyasirimedhi Institute of Science and Technology, Rayong 21210, Thailand.

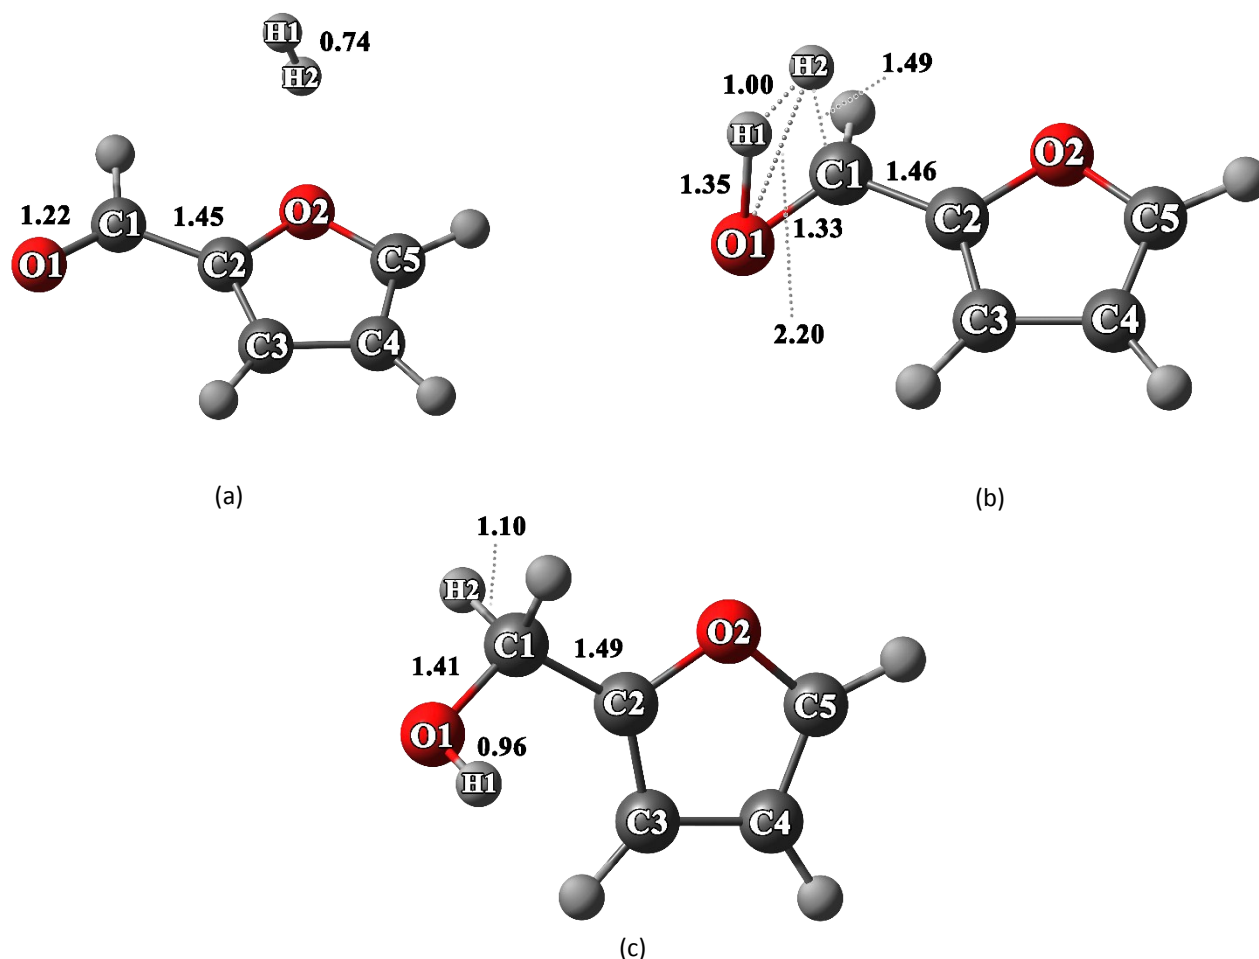

**Figure S1.** Optimized structures of (a) furfural and H<sub>2</sub> co-adsorption complex (Coads\_uncatalyzed), (b) transition state (TS\_uncatalyzed) and (c) furfural alcohol product (Prod\_uncatalyzed) of the gas phase uncatalyzed reaction.

**Table S1.** Optimized geometrical parameters of the species involved in the furfural hydrogenation on perfect framework of Sn-BEA zeolite.

| Parameter | Furfural adsorption (Ads) | Furfural and H <sub>2</sub> adsorption (Co-Ads) | Concerted TS (TS_C) | Furfuryl alcohol product (Prod) | Stepwise TS1 (TS1_S) | furylmethoxy intermediate (Int_S) | Stepwise TS2 (TS2_S) |
|-----------|---------------------------|-------------------------------------------------|---------------------|---------------------------------|----------------------|-----------------------------------|----------------------|
|           |                           |                                                 |                     | Distances (Å)                   |                      |                                   |                      |
| Sn-OF     | 2.32                      | 2.32                                            | 2.19                | 2.38                            | 2.31                 | 2.02                              | 2.11                 |
| OF-C1     | 1.25                      | 1.25                                            | 1.39                | 1.44                            | 1.31                 | 1.40                              | 1.42                 |
| C1-C2     | 1.42                      | 1.42                                            | 1.44                | 1.48                            | 1.46                 | 1.50                              | 1.48                 |
| H1-H2     | -                         | 0.75                                            | 0.94                | 2.26                            | 0.92                 | 2.96                              | 2.87                 |
| H1-C1     | -                         | 3.54                                            | 1.32                | 1.10                            | 1.35                 | 1.50                              | 1.10                 |
| H2-OF     | -                         | 3.04                                            | 1.43                | 0.96                            | 2.35                 | 3.27                              | 1.35                 |
| H2-O1     | -                         | 4.41                                            | 3.80                | 3.34                            | 1.32                 | 0.99                              | 1.12                 |
|           |                           |                                                 |                     | Angles (°)                      |                      |                                   |                      |
| O1-H2-OF  | -                         | 37.2                                            | 31.9                | 52.2                            | 94.8                 | 68.4                              | 130.7                |
| C1-OF-Sn  | 121.8                     | 112.5                                           | 116.9               | 117.6                           | 123.8                | 124.1                             | 135.3                |
| H1-C1-OF  | -                         | 70.0                                            | 104.7               | 110.6                           | 110.9                | 113.9                             | 109.8                |
| C2-C1-H1  | -                         | 66.9                                            | 108.1               | 111.0                           | 99.1                 | 109.1                             | 108.5                |

**Table S2.** Optimized geometrical parameters of the species involved in the furfural hydrogenation on defect framework of Sn-BEA zeolite.

| Parameter | Furfural adsorption (Ads) | Furfural and H <sub>2</sub> adsorption (Co-Ads) | Furfuryl alcohol product (Prod) | Stepwise TS1 (TS1_S) | furylmethoxy intermediate (Int_S) | Stepwise TS2 (TS2_S) |
|-----------|---------------------------|-------------------------------------------------|---------------------------------|----------------------|-----------------------------------|----------------------|
|           |                           |                                                 |                                 | Distances (Å)        |                                   |                      |
| Sn-OF     | 2.32                      | 2.32                                            | 2.25                            | 2.15                 | 2.00                              | 2.17                 |
| OF-C1     | 1.25                      | 1.25                                            | 1.45                            | 1.31                 | 1.41                              | 1.42                 |
| C1-C2     | 1.42                      | 1.42                                            | 1.48                            | 1.44                 | 1.48                              | 1.49                 |
| H1-H2     | -                         | 0.75                                            | 2.87                            | 0.88                 | 3.14                              | 3.25                 |
| H1-C1     | -                         | 3.69                                            | 1.10                            | 1.47                 | 1.10                              | 1.10                 |
| H2-OF     | -                         | 2.80                                            | 0.98                            | 2.36                 | 2.76                              | 1.24                 |
| H2-O1     | -                         | 4.47                                            | 2.69                            | 1.46                 | 0.97                              | 1.23                 |
|           |                           |                                                 |                                 | Angles (°)           |                                   |                      |
| O1-H2-OF  | -                         | 36.1                                            | 82.7                            | 90.8                 | 87.1                              | 134.1                |
| C1-OF-Sn  | 118.1                     | 118.1                                           | 120.9                           | 123.2                | 120.0                             | 139.4                |
| H1-C1-OF  | -                         | 68.6                                            | 103.7                           | 106.9                | 108.2                             | 108.3                |
| C2-C1-H1  | -                         | 69.9                                            | 112.7                           | 103.8                | 109.9                             | 110.0                |
